# Supplementary material
Source: Elsevier journal article supplement (https://comptes-rendus.academie-sciences.fr/geoscience/article/10.1016/j.crte.2015.12.003/file/attach/mmc1.pdf)
Supplement: mmc1 [file mmc1.pdf]

|    | name (from E to W)                | inventor                                     | sector    | x      | y       | z                                              | shape and size          | nature of peridotite                                                             | serpentinisation                                        | ophicalcites                                        | wallrocks | visible contacts    |                                            |
|----|-----------------------------------|----------------------------------------------|-----------|--------|---------|------------------------------------------------|-------------------------|----------------------------------------------------------------------------------|---------------------------------------------------------|-----------------------------------------------------|-----------|---------------------|--------------------------------------------|
| 1  | <b>Bois de la Pinouse</b>         | Mussy, 1869                                  | Prades    | 406510 | 4738630 | center                                         | between 1500 and 1720 m | one (?) big lense of 1.5 x 0.5 km, with a WSW-ENE long axis                      | lherzolite                                              | low, late serpentinite veins                        | yes       | metamorphic breccia | good outcrops along the S and NE contacts  |
| 2  | <b>Pic de Geral</b>               | Mussy, 1869                                  | Prades    | 406030 | 4737520 | center                                         | between 1650 and 1775 m | one lense of 0.6 x 0.3 km, with a WSW-ENE long axis                              | lherzolite                                              | low, late serpentinite veins                        | yes       | metamorphic breccia | a few outcrop along the S contact          |
| 3  | <b>Rocher de Scaramus</b>         | this work                                    | Prades    | 405193 | 4737460 |                                                | 1700 m                  | 2-3 decametric lenses                                                            | lherzolite                                              | low                                                 | yes       | metamorphic breccia | few outcrops                               |
| 4  | <b>Amblaux</b>                    | Lacroix, 1894                                | Caussou   | 403774 | 4735574 | center                                         | 1000 m                  | at least 6 pluri-metric to pluri-decametric lenses                               | amphibole bearing lherzolite                            | low                                                 | yes       | metamorphic breccia | good outcrops on the N side                |
|    |                                   |                                              |           | 403805 | 4735580 | "bosses intrusives" of Lacroix 1894            | 1026 m                  |                                                                                  |                                                         |                                                     |           |                     |                                            |
| 5  | <b>Bois du Fajou</b>              | Lacroix, 1894<br>this work                   | Caussou   | 403976 | 4736191 | easiest accessible outcrop along the trail     | between 1150 and 1400 m | at least 7 pluri-decametric to hectometric principal lenses with NE-SW long axis | lherzolite, amphibole bearing lherzolite                | variable, but generally low                         | yes       | metamorphic breccia | parts of the contact visible on each lense |
| 6  | <b>Caussou</b>                    | this work                                    | Caussou   | 402555 | 4736380 |                                                | 960 m                   | small metric to decimetric dispersed blocs                                       | lherzolite                                              | low                                                 | yes       | metamorphic breccia | few outcrops                               |
| 7  | <b>Ancienne piste de Trimouns</b> | this work                                    | Bestiac   |        |         | all along the old road (see map)               | between 950 and 1100 m  | metric clusters of decimetric blocs and isolated centimetric to decimetric blocs | lherzolite                                              | low                                                 | yes       | metamorphic breccia | yes                                        |
| 8  | <b>Bestiac</b>                    | Lacroix, 1894<br>Monchoux, 1970<br>this work | Bestiac   | 400100 | 4735900 | East part                                      | between 850 and 1000 m  | metric to hectometric lenses dispersed on a 900 x 300 m area, E-W long axis      | lherzolite, amphibole bearing lherzolite, harzburgite ? | mix of variously serpentinitized blocs              | yes       | metamorphic breccia | good outcropping conditions                |
|    |                                   |                                              |           | 400800 | 4736000 | Center part                                    |                         |                                                                                  |                                                         |                                                     |           |                     |                                            |
|    |                                   |                                              |           | 400600 | 4735900 | West part                                      |                         |                                                                                  |                                                         |                                                     |           |                     |                                            |
|    |                                   |                                              |           | 401139 | 4735922 | old quarry with spectacular serpentinite veins |                         |                                                                                  |                                                         |                                                     |           |                     |                                            |
| 9  | <b>Pic Calmont</b>                | Ravier et Thiebaut, 1963                     | Bestiac   | 399649 | 4736349 | center                                         | between 1100 and 1120 m | one irregular lense of 60 x 20 m, with a E-W long axis                           | lherzolite                                              | low                                                 | yes       | metamorphic breccia | good outcrops along the N contact          |
| 10 | <b>Urs</b>                        | Lemeyrie, 1863                               | Bestiac   | 396829 | 4737254 | center                                         | between 860 and 920 m   | one irregular lense of 80 x 60 m, with a NE-SO long axis                         | lherzolite                                              | low                                                 | yes       | metamorphic breccia | almost 100% of the contacts are visible    |
| 11 | <b>Croix de Sainte Tanoque</b>    | Cordier, 1868                                | Vicdessos | 380630 | 4736570 | NE border                                      | between 1250 and 1300 m | one (?) lense of 220 x 90 m, with a WNW-ESE long axis                            | lherzolite                                              | increasing serpentinitisation from E to W           | yes       | metamorphic breccia | rares outcrops on the NE side              |
| 12 | <b>Sem</b>                        | Charpentier, 1812                            | Vicdessos | 378924 | 4736508 | contact on the NE border                       | between 950 and 1050 m  | one triangular lense of 150 x 250 m, with an E-W long axis                       | px-rich lherzolite                                      | low, late serpentinite veins                        | yes       | metamorphic breccia | along the NE and SE contacts               |
| 13 | <b>Les Rouges</b>                 | Charpentier, 1812                            | Vicdessos | 377250 | 4737090 | lower part                                     | between 830 and 910 m   | one lense of 150 x 70 m, NW-SE long axis                                         | lherzolite                                              | variable but generally low, late serpentinite veins | yes       | metamorphic breccia | good outcrops                              |
|    |                                   |                                              |           | 377198 | 4737218 | W contact in the upper part                    |                         |                                                                                  |                                                         |                                                     |           |                     |                                            |
| 14 | <b>Porteteny</b>                  | Charpentier, 1812                            | Vicdessos | 377208 | 4736815 | lower SE contact                               | between 760 and 780 m   | one lense of 120 x 70 m, E-W long axis                                           | lherzolite                                              | low, late serpentinite veins                        | yes       | metamorphic breccia | rare outcrops on the N and S side          |
| 15 | <b>Pic Coudère inf.</b>           | Charpentier, 1812                            | Vicdessos | 376607 | 4737029 |                                                | 950 m                   | one small decametric lense with a NW-SE long axis                                | lherzolite                                              | low, late serpentinite veins                        | ?         | metamorphic breccia | no visible contacts                        |
| 16 | <b>Pic Coudère sup.</b>           | Lacroix, 1895                                | Vicdessos | 376490 | 4737175 |                                                | 1010 m                  | one decametric lense                                                             | lherzolite                                              | low                                                 | yes       | metamorphic breccia | rare outcrops                              |
| 17 | <b>Roc de Souberque</b>           | Lacroix, 1894                                | Vicdessos | 373633 | 4738189 |                                                | 1200 m                  | one lense of 100 x 70 m                                                          | lherzolite                                              | low                                                 | yes       | metamorphic breccia | rare outcrops on the E side                |
